# Supplementary material
Source: PubMed Central journal article supplement (PMC2717010)
Supplement: NIHMS97197-supplement-figure.pdf [file NIHMS97197-supplement-figure.pdf]

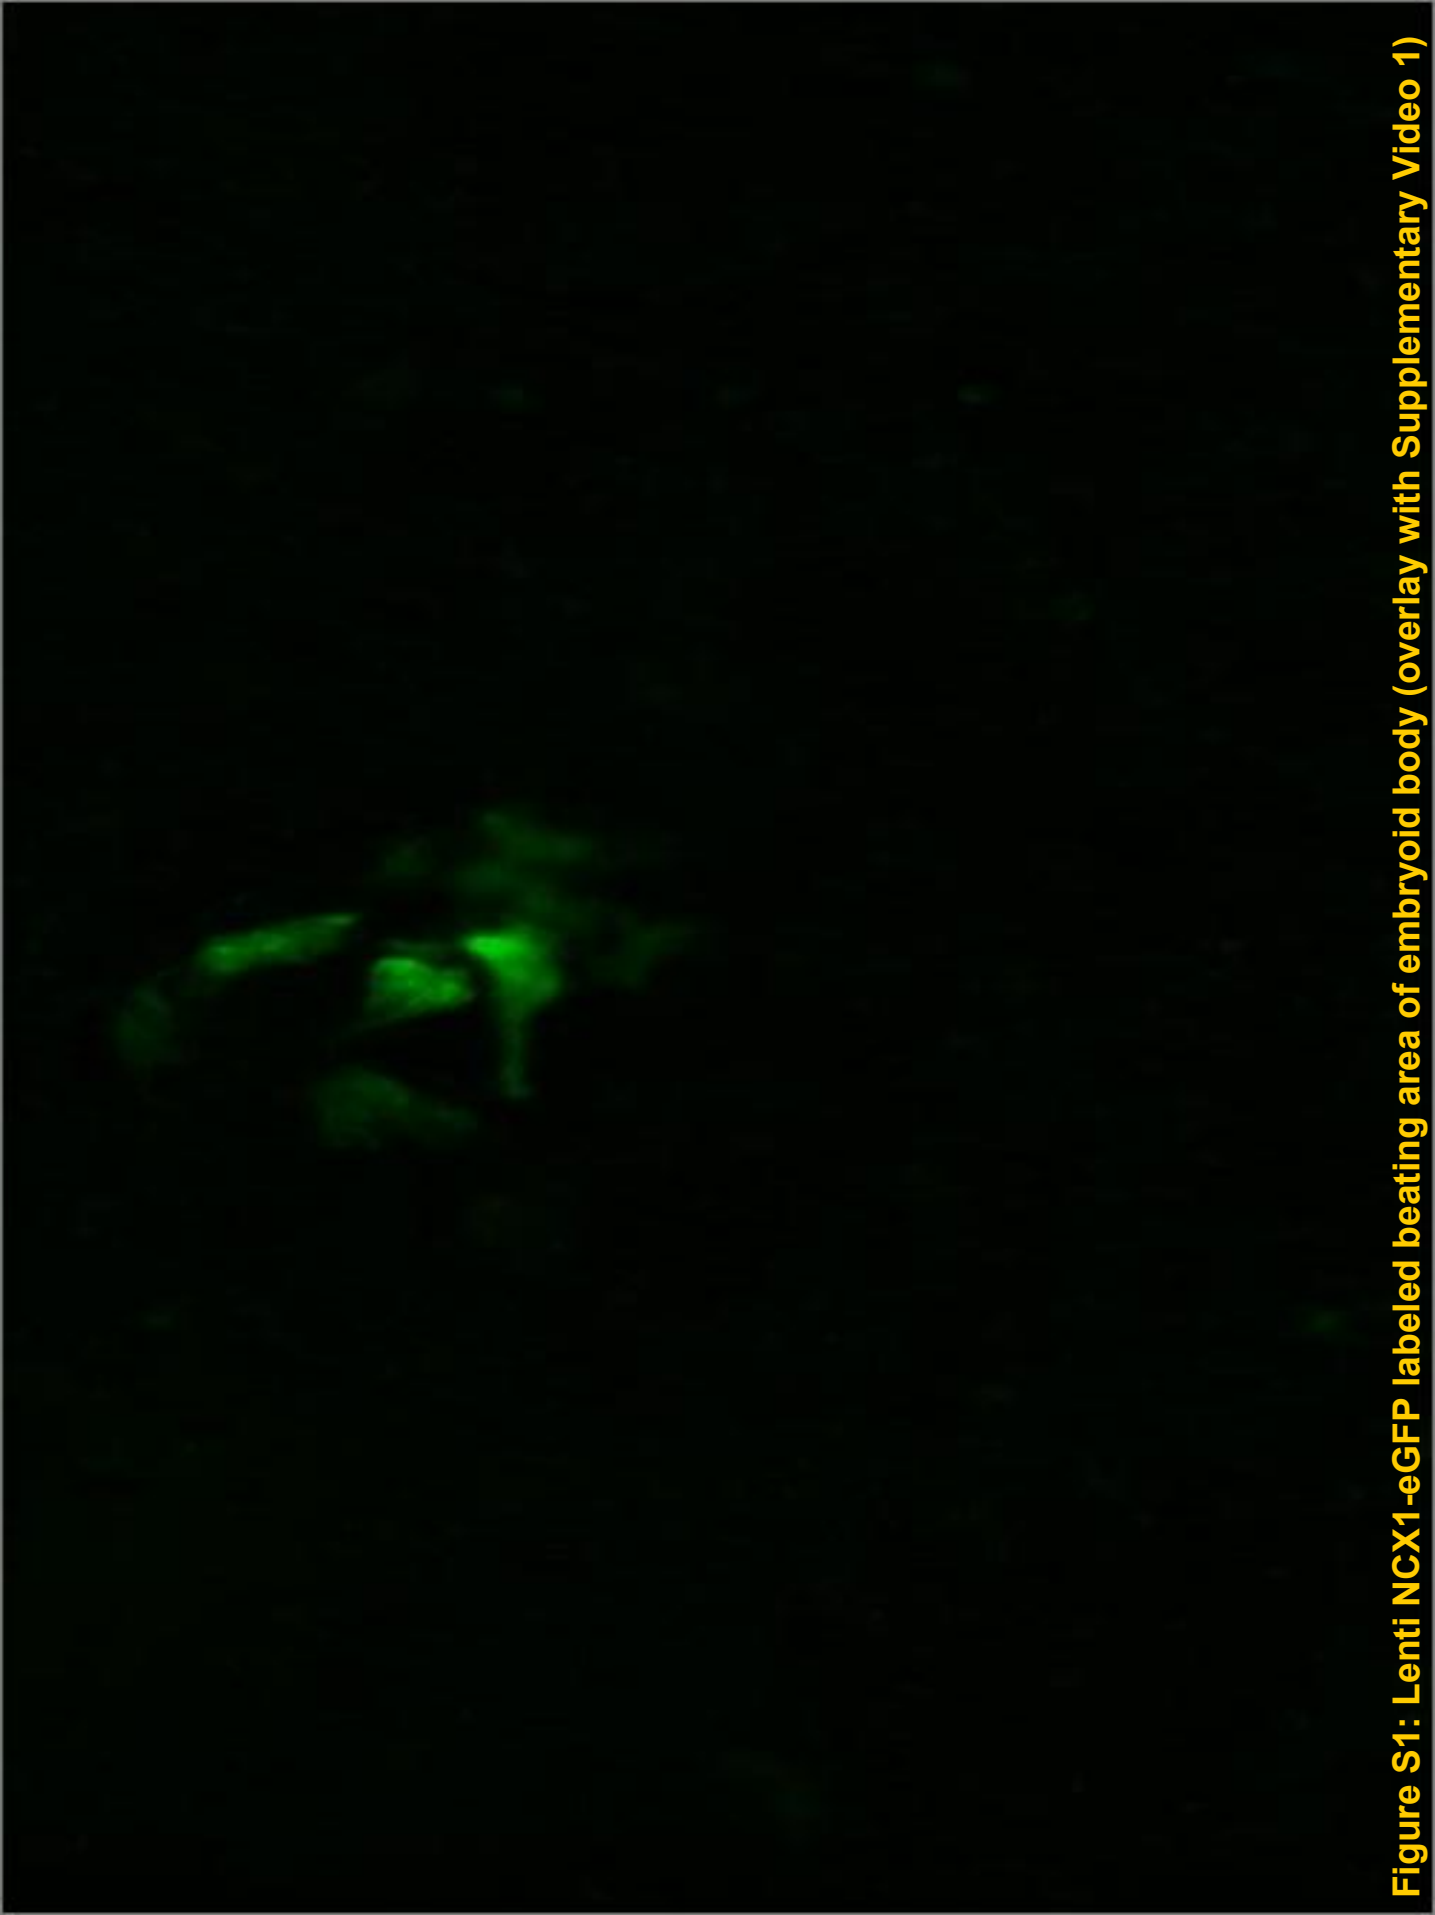

**Figure S1: Lenti NCX1-eGFP labeled beating area of embryoid body (overlay with Supplementary Video 1)**
